# Supplementary material for: Long-Term Safety and Efficacy of Lowering Low-Density Lipoprotein Cholesterol With Statin Therapy: 20-Year Follow-Up of West of Scotland Coronary Prevention Study
Source: PubMed Central journal article supplement — Circulation. 2016 Mar 14;133(11):1073–80. doi: 10.1161/CIRCULATIONAHA.115.019014 (PMC4894764; doi:10.1161/circulationaha.115.019014), 2016-03-14
Supplement: cir-133-1073-s001.pdf [file cir-133-1073-s001.pdf]

## SUPPLEMENTAL MATERIAL

Supplemental Table 1: Number of events (%) and hazard ratios comparing pravastatin versus placebo for all cause and cause-specific incident cancers. Analysis by time to first event.

|                                                   | Placebo (n=3293) | Pravastatin ( n = 3302) |
|---------------------------------------------------|------------------|-------------------------|
| <b>All incident cancer<sup>†</sup></b>            |                  |                         |
| Events/N (%)                                      | 809 (24.6)       | 802 (24.3)              |
| Hazard Ratio (95% CI) <sup>‡</sup>                | 1.0              | 0.96 (0.87, 1.06)       |
| P-value <sup>‡</sup>                              |                  | 0.41                    |
| <b>Site-specific incident cancers<sup>†</sup></b> |                  |                         |
| <b>Colorectal</b>                                 |                  |                         |
| Events/N (%)                                      | 139 (4.2)        | 127 (3.8)               |
| Hazard Ratio (95% CI) <sup>‡</sup>                | 1.0              | 0.87 (0.69, 1.11)       |
| P-value <sup>‡</sup>                              |                  | 0.27                    |
| <b>Lung</b>                                       |                  |                         |
| Events/N (%)                                      | 197 (6.0)        | 178 (5.4)               |
| Hazard Ratio (95% CI) <sup>‡</sup>                | 1.0              | 0.87 (0.71, 1.06)       |
| P-value <sup>‡</sup>                              |                  | 0.17                    |
| <b>Prostate</b>                                   |                  |                         |
| Events/N (%)                                      | 167 (5.1)        | 185 (5.6)               |
| Hazard Ratio (95% CI) <sup>‡</sup>                | 1.0              | 1.06 (0.86, 1.31)       |
| P-value <sup>‡</sup>                              |                  | 0.57                    |
| <b>Upper GI</b>                                   |                  |                         |
| Events/N (%)                                      | 77 (2.3)         | 85 (2.6)                |
| Hazard Ratio (95% CI) <sup>‡</sup>                | 1.0              | 1.06 (0.78, 1.45)       |
| P-value <sup>‡</sup>                              |                  | 0.70                    |
| <b>Urinary tract</b>                              |                  |                         |
| Events/N (%)                                      | 96 (2.9)         | 98 (3.0)                |
| Hazard Ratio (95% CI) <sup>‡</sup>                | 1.0              | 0.99 (0.74, 1.31)       |
| P-value <sup>‡</sup>                              |                  | 0.93                    |
| <b>Other cancer</b>                               |                  |                         |
| Events/N (%)                                      | 190 (5.8)        | 201 (6.1)               |
| Hazard Ratio (95% CI) <sup>‡</sup>                | 1.0              | 1.02 (0.84, 1.25)       |
| P-value <sup>‡</sup>                              |                  | 0.84                    |

\*Excludes participants who died or had event of interest within trial. <sup>‡</sup>Adjusted for age, body mass index, smoking status (current, ex-smoker, never) and deprivation (DEPCAT).

Supplemental Table 2: Primary reason for non-cardiovascular hospital admissions by ICD 10 chapter for day cases. Number of subjects with events and cumulative recurrent events.

| ICD 10 chapter                                                                                              | Placebo (n = 3293)   |        | Pravastatin (n = 3302) |        |
|-------------------------------------------------------------------------------------------------------------|----------------------|--------|------------------------|--------|
|                                                                                                             | Subjects with events | Events | Subjects with events   | Events |
| A00-B99 Certain infectious and parasitic diseases                                                           | 27                   | 28     | 21                     | 28     |
| C00-D49 Neoplasms                                                                                           | 667                  | 2264   | 687                    | 2504   |
| D40-D89 Diseases of the blood and blood-forming organs and certain disorders involving the immune mechanism | 95                   | 216    | 104                    | 251    |
| E00-E90 Endocrine, nutritional and metabolic diseases                                                       | 25                   | 112    | 28                     | 150    |
| F00-F99 Mental and behavioural disorders                                                                    | 13                   | 13     | 9                      | 9      |
| G00-G99 Diseases of the nervous system                                                                      | 46                   | 58     | 49                     | 86     |
| H00-H59 Diseases of the eye and adnexa                                                                      | 362                  | 581    | 430                    | 692    |
| H60-H95 Diseases of the ear and mastoid process                                                             | 20                   | 23     | 27                     | 36     |
| I00-I99 Diseases of the circulatory system                                                                  | 0                    | 0      | 0                      | 0      |
| J00-J99 Diseases of the respiratory system                                                                  | 74                   | 80     | 88                     | 96     |
| K00-K93 Disease of the digestive system                                                                     | 990                  | 1663   | 995                    | 1791   |
| L00-L99 Diseases of the skin and subcutaneous tissue                                                        | 228                  | 364    | 220                    | 331    |
| M00-M99 Diseases of the musculoskeletal system and connective tissue                                        | 224                  | 501    | 192                    | 381    |
| N00-N99 Diseases of the genitourinary system                                                                | 434                  | 614    | 456                    | 665    |
| Q00-Q99 Congenital malformations, deformations and chromosomal abnormalities                                | 5                    | 5      | 2                      | 2      |
| R00-R99 Symptoms, signs and abnormal clinical and laboratory findings, not elsewhere classified             | 710                  | 954    | 693                    | 907    |
| S00-T98 Injury, poisoning and certain other consequences of external causes                                 | 100                  | 118    | 116                    | 161    |
| V01-Y98 External causes of morbidity and mortality                                                          | 96                   | 136    | 92                     | 138    |
| Z00-Z99 Factors influencing health status and contact with health services                                  | 448                  | 820    | 445                    | 997    |
| Uncoded                                                                                                     | 6                    | 6      | 1                      | 1      |

Supplemental Table 3: Primary reason for non cardiovascular hospital admissions by ICD 10 chapter for non-day cases. Number of subjects with events and cumulative recurrent events.

| ICD 10 chapter                                                                                              | Placebo (n = 3293)   |        | Pravastatin (n = 3302) |        |
|-------------------------------------------------------------------------------------------------------------|----------------------|--------|------------------------|--------|
|                                                                                                             | Subjects with events | Events | Subjects with events   | Events |
| A00-B99 Certain infectious and parasitic diseases                                                           | 87                   | 94     | 59                     | 73     |
| C00-D49 Neoplasms                                                                                           | 728                  | 1904   | 734                    | 1985   |
| D40-D89 Diseases of the blood and blood-forming organs and certain disorders involving the immune mechanism | 82                   | 102    | 79                     | 109    |
| E00-E90 Endocrine, nutritional and metabolic diseases                                                       | 72                   | 90     | 62                     | 81     |
| F00-F99 Mental and behavioural disorders                                                                    | 64                   | 74     | 50                     | 68     |
| G00-G99 Diseases of the nervous system                                                                      | 123                  | 177    | 113                    | 157    |
| H00-H59 Diseases of the eye and adnexa                                                                      | 135                  | 181    | 125                    | 175    |
| H60-H95 Diseases of the ear and mastoid process                                                             | 39                   | 46     | 47                     | 55     |
| I00-I99 Diseases of the circulatory system                                                                  | 2                    | 2      | 0                      | 0      |
| J00-J99 Diseases of the respiratory system                                                                  | 482                  | 906    | 482                    | 813    |
| K00-K93 Disease of the digestive system                                                                     | 786                  | 1281   | 854                    | 1411   |
| L00-L99 Diseases of the skin and subcutaneous tissue                                                        | 119                  | 148    | 127                    | 168    |
| M00-M99 Diseases of the musculoskeletal system and connective tissue                                        | 491                  | 771    | 552                    | 828    |
| N00-N99 Diseases of the genitourinary system                                                                | 569                  | 891    | 537                    | 863    |
| Q00-Q99 Congenital malformations, deformations and chromosomal abnormalities                                | 17                   | 19     | 11                     | 12     |
| R00-R99 Symptoms, signs and abnormal clinical and laboratory findings, not elsewhere classified             | 1041                 | 1962   | 1004                   | 1826   |
| S00-T98 Injury, poisoning and certain other consequences of external causes                                 | 478                  | 614    | 470                    | 659    |
| V01-Y98 External causes of morbidity and mortality                                                          | 30                   | 33     | 37                     | 47     |
| Z00-Z99 Factors influencing health status and contact with health services                                  | 188                  | 241    | 179                    | 247    |
| Uncoded                                                                                                     | 9                    | 11     | 5                      | 5      |

Supplemental Figure 1: Cumulative incidence functions for cancer mortality and incident cancer

### 1a) Cancer Mortality

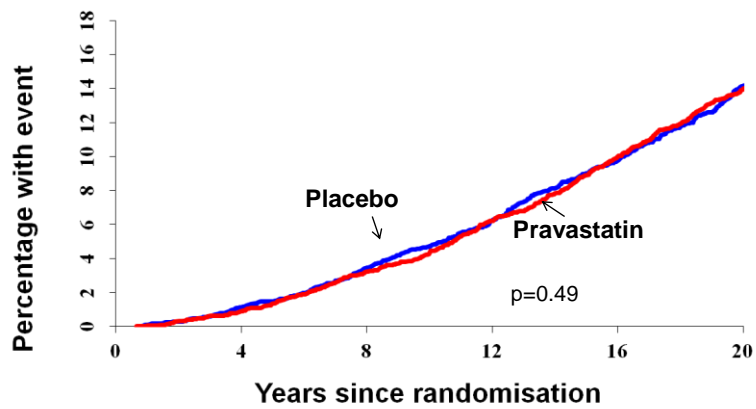

**Numbers at risk:**

|             |      |      |      |      |      |      |
|-------------|------|------|------|------|------|------|
| Placebo     | 3293 | 3185 | 3021 | 2785 | 2501 | 2203 |
| Pravastatin | 3302 | 3223 | 3069 | 2838 | 2598 | 2295 |

### 1b) Cancer Incidence

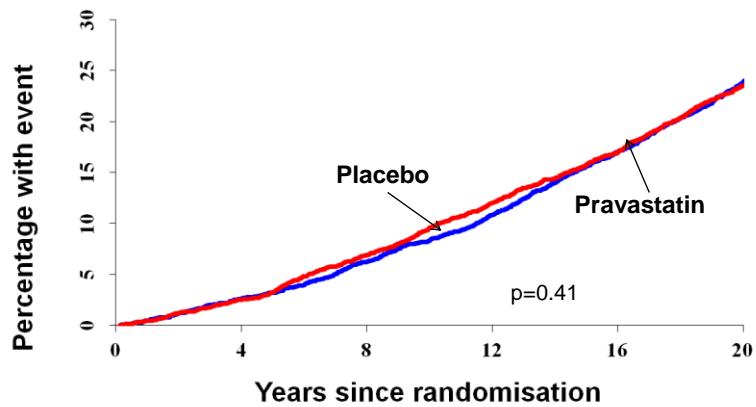

**Numbers at risk:**

|             |      |      |      |      |      |      |
|-------------|------|------|------|------|------|------|
| Placebo     | 3293 | 3138 | 2923 | 2647 | 2317 | 1448 |
| Pravastatin | 3302 | 3172 | 2952 | 2658 | 2377 | 1548 |

Supplemental Figure 2: Cumulative hospital admissions including recurrent events involving coronary heart disease, stroke and non cardiovascular causes

### 2a) Cumulative hospitalisations (coronary heart disease)

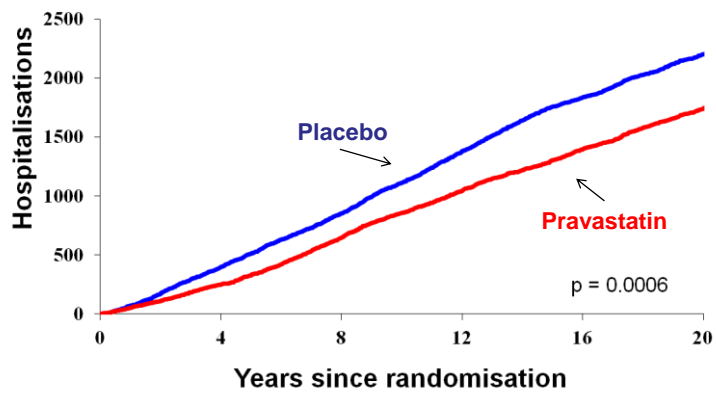

### 2b) Cumulative hospitalisations (stroke)

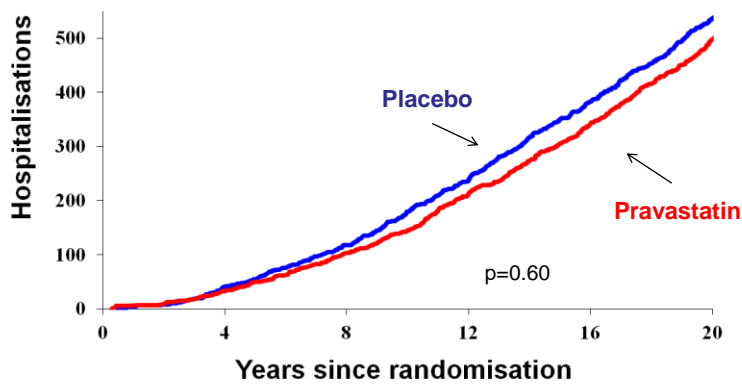

## 2c) Cumulative hospitalisations (non cardiovascular)

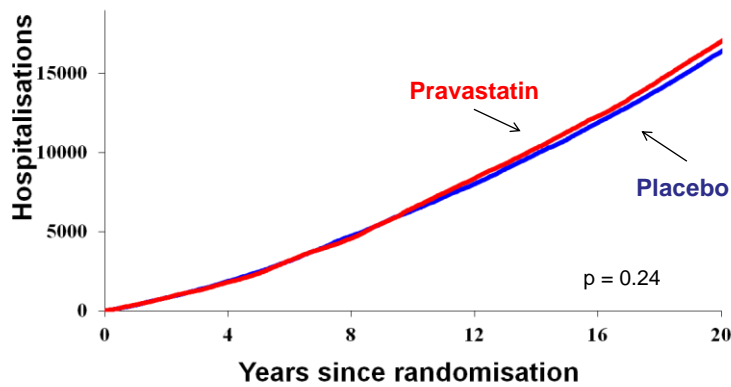

### Supplemental Figure legends

Figure 1 Cumulative incidence functions for all-cancer mortality and morbidity. P values determined by Cox proportional hazards model.

Figure 2. Cumulative numbers of hospital admissions for the outcomes of (a) coronary heart disease, (b) stroke, and (c) all non-cardiovascular causes. P values were computed by re-randomisation tests.
